# Supplementary material
Source: publisher figshare collection journal article supplement (https://acs.figshare.com/ndownloader/files/4624786)
Supplement: Supplementary file 1 [file 4624786]

# **Ordering of PS-*b*-P4VP on Patterned Silicon Surfaces**

Soojin Park<sup>1</sup>, Bokyung Kim<sup>1</sup>, Ozgur Yavuzcetin<sup>2</sup>, Mark T. Tuominen<sup>2</sup>

and Thomas P. Russell<sup>1\*</sup>

<sup>1</sup>Department of Polymer Science & Engineering, <sup>2</sup>Department of Physics, University of  
Massachusetts, Amherst, 01003

\*Corresponding authors:

Thomas P. Russell, E-mail: [russell@mail.pse.umass.edu](mailto:russell@mail.pse.umass.edu)

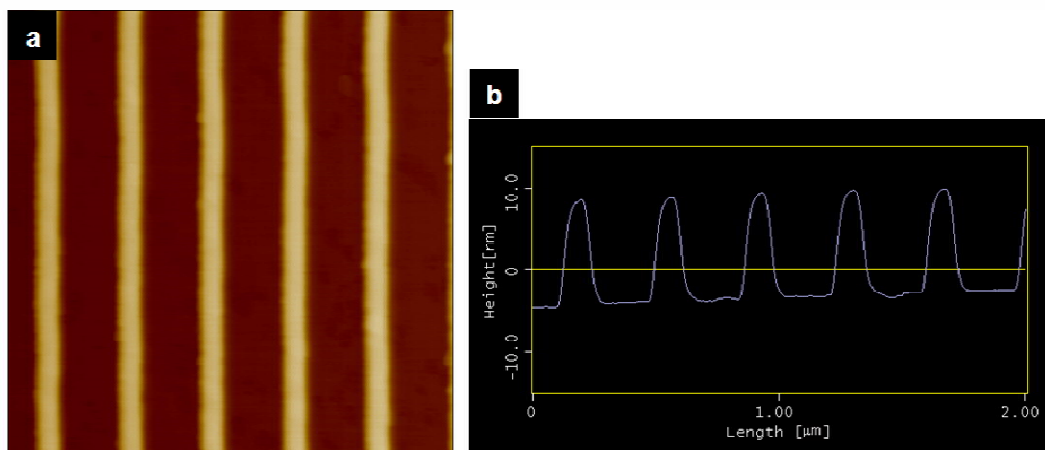

**Figure S1.** (a) Height mode SFM image ( $2\ \mu\text{m} \times 2\ \mu\text{m}$ ) of representative bare grating pattern with a line width of 100 nm and a separation distance of 380 nm and (b) cross-sectional line scan showing depth of  $\sim 14\ \text{nm}$ .

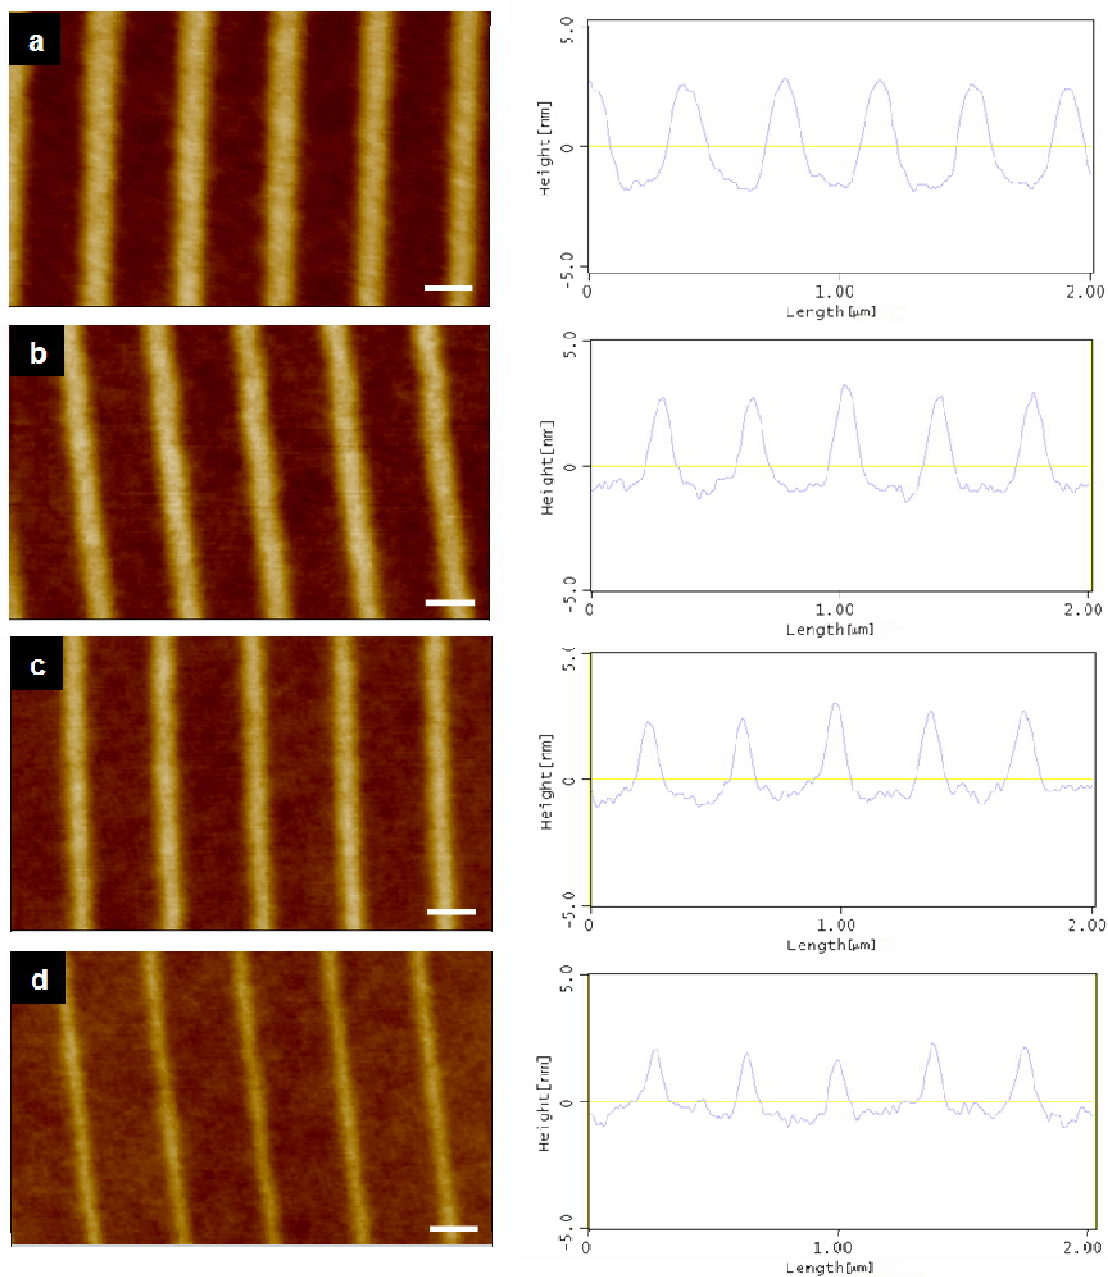

**Figure S2.** SFM cross sectional scans used to measure height for spin-coated PS-b-P4VP films on three different grating widths. (a) 120 nm width, (b) 100 nm width, (c) 80 nm width, and (d) 50 nm width (Height mode SFM images: scale bars are 200 nm).

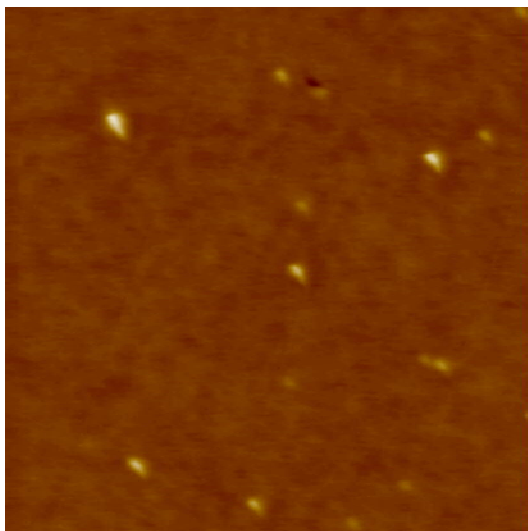

**Figure S3.** Height mode SFM image ( $2\ \mu\text{m} \times 2\ \mu\text{m}$ ) of 12.8 nm thick PS-b-P4VP thin films after solvent annealing in THF vapor for 3 hrs.

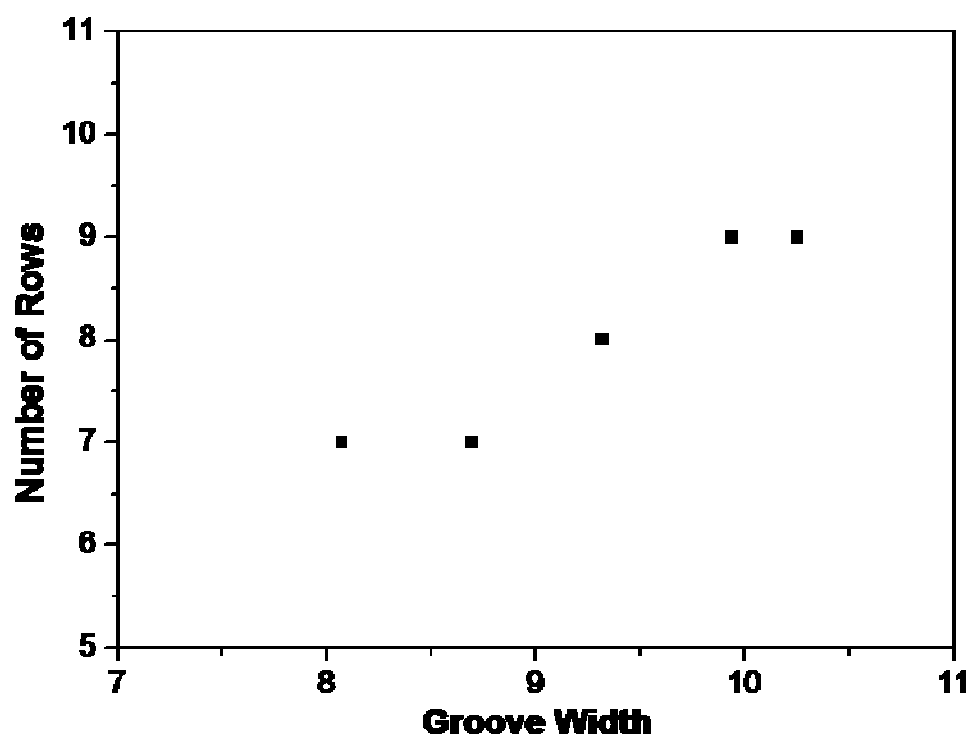

**Figure S4.** The number of rows of PS-b-P4VP micelles in the trough versus the trough widths expressed in terms of the row spacing, which is 37.2 nm in this polymer.

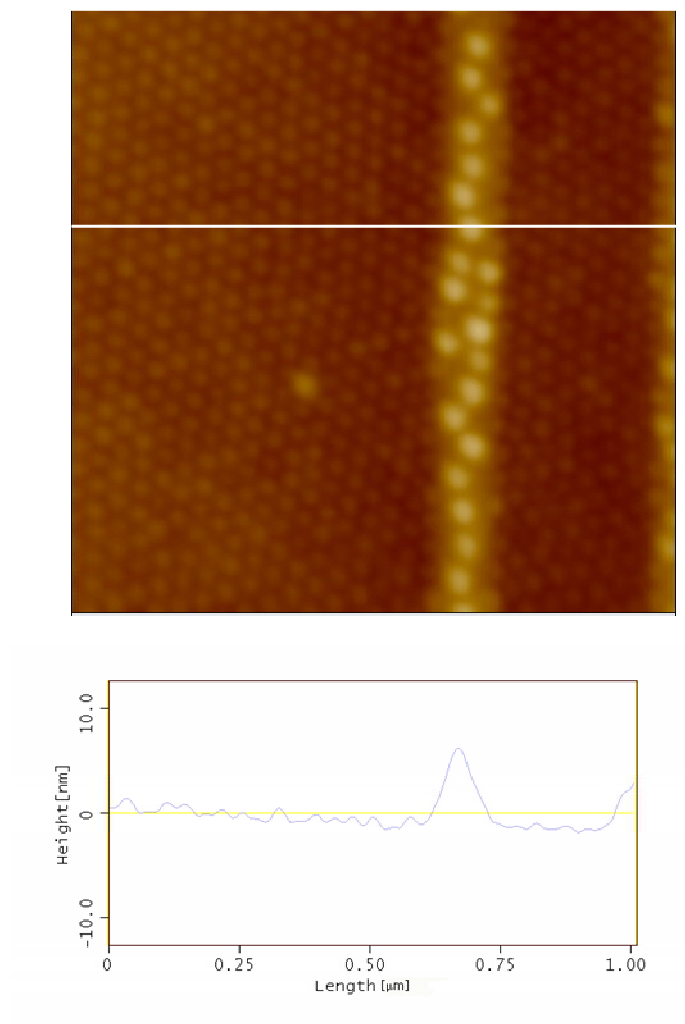

**Figure S5.** Height mode SFM image (top, 1  $\mu\text{m}$  x 1  $\mu\text{m}$ ) of PS-b-P4VP micelle on the crest and trough of grating pattern after solvent annealing in THF vapor for 8 hrs and cross sectional line scan (bottom).

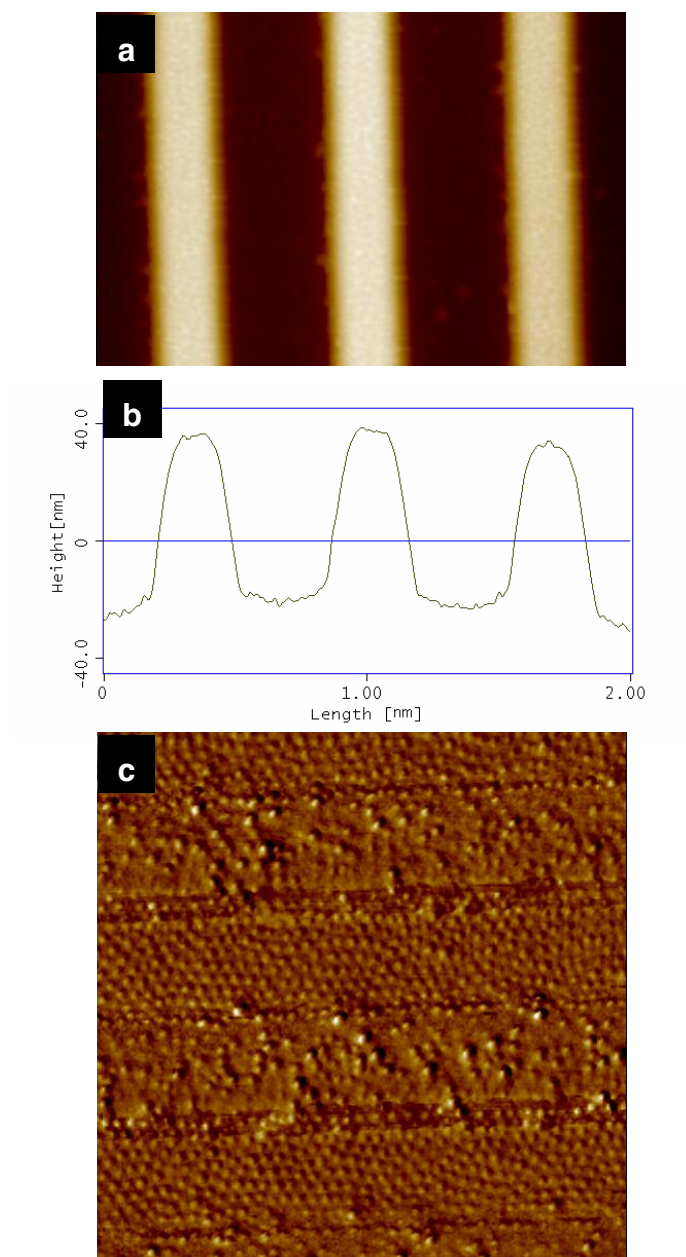

**Figure S6.** SFM image of trench pattern and micellar structure annealed under THF vapor on the trench. (a) SFM image of trench pattern ( $2\ \mu\text{m} \times 1.4\ \mu\text{m}$ ), (b) Cross-section of trench pattern, and (c) Long-range ordered micelles on the trench pattern ( $1.5\ \mu\text{m} \times 1.5\ \mu\text{m}$ ).

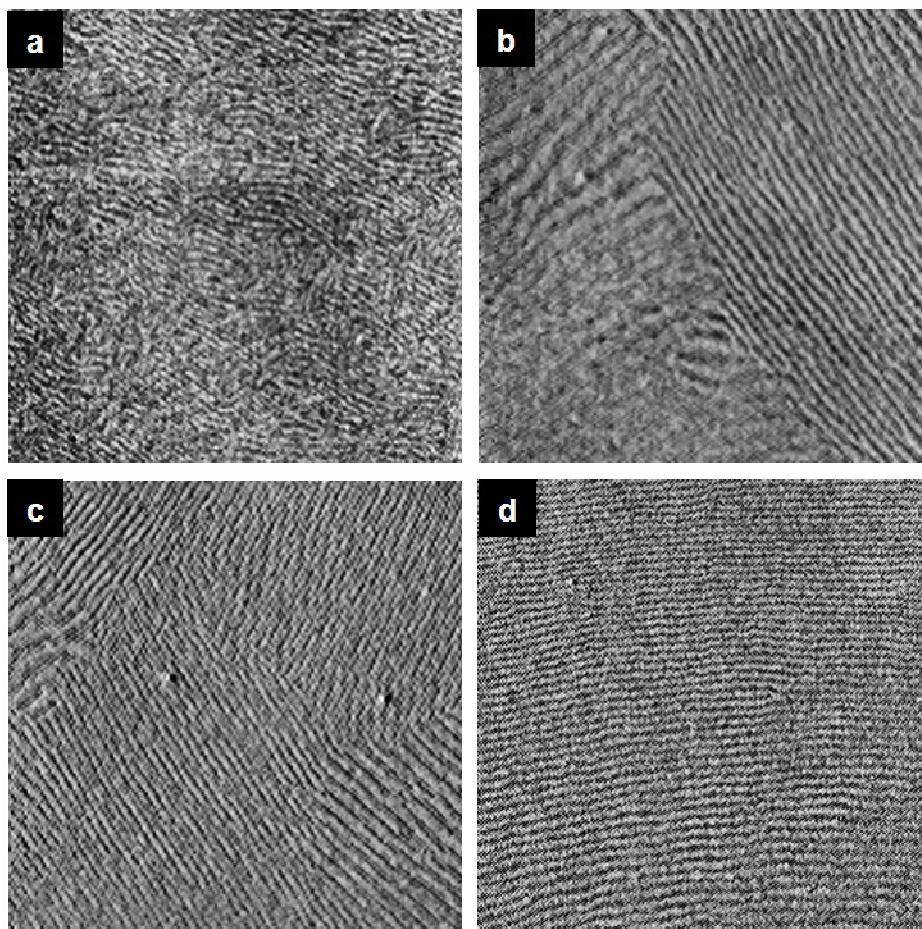

**Figure S7.** Moiré patterns obtained from different annealing time (Phase mode SFM,  $5\mu\text{m} \times 5\mu\text{m}$ ). Solvent annealing of PS-b-P4VP micellar films was carried out in THF vapor for (a) 1 hr, (b) 2 hrs, (c) 4 hrs, and (d) 6 hrs. As annealing time increases, grain size gradually increases as shown in Moiré patterns.
